# Supplementary material for: Differential activation of JAK-STAT signaling reveals functional compartmentalization in Drosophila blood progenitors
Source: eLife. 2021 Feb 17;10:e61409. doi: 10.7554/eLife.61409 (PMC7920551; doi:10.7554/eLife.61409)
Supplement: Figure 1—figure supplement 1—source data 1. [file elife-61409-fig1-figsupp1-data1.xlsx]

## Sheet: 60h AEL DAPI cell counts
60h AEL
DAPI+ nuclei x 100	pri	sec	tert.		Fold change	Pri.	Post.
	0.94	0.15	0			1	0.15
	0.98	0.14	0			1	0.14
	0.84	0.19	0.11			1	0.35
	0.89	0.13	0.05			1	0.2
	0.69	0.1	0.04			1	0.2
	0.78	0.11	0			1	0.14
	0.46	0.24	0			1	0.52
	0.66	0.23	0.14			1	0.56
	0.64	0.25	0.12			1	0.57
Krukal-Wallis test							Table Analyzed	Fold change DAPI counts (60hAEL)
Number of families	1
Number of comparisons per family	3						Column B	Post.
Alpha	0.05						vs.	vs.
							Column A	Pri.
Dunn's multiple comparisons test	Mean rank diff.	Significant?	Summary	Adjusted P Value
Pri. vs. Sec.	9.778	Yes	*	0.0265	A-B		Unpaired t test
Pri. vs. Tert.	17.22	Yes	****	<0.0001	A-C		P value	<0.0001
Sec. vs. Tert.	7.444	No	ns	0.1387	B-C		P value summary	****
							Significantly different (P < 0.05)?	Yes
Test details	Mean rank 1	Mean rank 2	Mean rank diff.	n1	n2		One- or two-tailed P value?	Two-tailed
Pri. vs. Sec.	23	13.22	9.778	9	9		t, df	t=10.93, df=16
Pri. vs. Tert.	23	5.778	17.22	9	9
Sec. vs. Tert.	13.22	5.778	7.444	9	9		How big is the difference?
							Mean of column A	1
							Mean of column B	0.3144
							Difference between means (B - A) ± SEM	-0.6856 ± 0.06272
							95% confidence interval	-0.8185 to -0.5526
							R squared (eta squared)	0.8819
							F test to compare variances
							F, DFn, Dfd	Infinity, 8, 8
							P value	<0.0001
							P value summary	****
							Significantly different (P < 0.05)?	Yes
							Data analyzed
							Sample size, column A	9
							Sample size, column B	9

## Sheet: 72h AEL DAPI cell counts
72h AEL
DAPI+ nuclei x 100	pri	sec	tert.		Fold change	Pri.	Post.
	1.89	1.06	0.68			1	0.92
	2.44	1.21	0.43			1	0.67
	1.13	0.28	0.19			1	0.41
	1.81	1.29	0.93			1	1.22
	2.76	1.38	1			1	0.86
	2.58	2.28	0.51			1	1.08
	2.16	1.21	0			1	0.56
	3.45	1.19	1.13			1	0.67
	2.32	1.15	0			1	0.49
	2.36	0.94	0.6			1	0.65
	2.78	1.28	0.39			1	0.6
	2.11	1.21	0.87			1	0.98
	2.35	1.26	0.63			1	0.8
Krukal-Wallis test
Number of families	1								Table Analyzed	Fold change DAPI counts early L3 (72hAEL)
Number of comparisons per family	3
Alpha	0.05								Column B	Post.
									vs.	vs.
Dunn's multiple comparisons test	Mean rank diff.	Significant?	Summary	Adjusted P Value					Column A	Pri.
Pri. vs. Sec.	11.81	Yes	*	0.0248	A-B
Pri. vs. Tert.	23.85	Yes	****	<0.0001	A-C				Unpaired t test
Sec. vs. Tert.	12.04	Yes	*	0.0213	B-C				P value	0.0015
									P value summary	**
Test details	Mean rank 1	Mean rank 2	Mean rank diff.	n1	n2				Significantly different (P < 0.05)?	Yes
Pri. vs. Sec.	31.88	20.08	11.81	13	13				One- or two-tailed P value?	Two-tailed
Pri. vs. Tert.	31.88	8.038	23.85	13	13				t, df	t=3.577, df=24
Sec. vs. Tert.	20.08	8.038	12.04	13	13
									How big is the difference?
									Mean of column A	1
									Mean of column B	0.7623
									Difference between means (B - A) ± SEM	-0.2377 ± 0.06645
									95% confidence interval	-0.3748 to -0.1005
									R squared (eta squared)	0.3477
									F test to compare variances
									F, DFn, Dfd	Infinity, 12, 12
									P value	<0.0001
									P value summary	****
									Significantly different (P < 0.05)?	Yes
									Data analyzed
									Sample size, column A	13
									Sample size, column B	13

## Sheet: 96h AEL DAPI cell counts
96h AEL
DAPI+ nuclei x 100	pri	sec	tert.		Fold change	Pri.	Post.
	3.51	2.29	1.55			1	1.09
	3.78	2.18	1.45			1	0.96
	3.31	1.36	0.84			1	0.66
	3.58	1.11	1.31			1	0.67
	2.64	2.13	0.84			1	1.12
	4.28	1.3	0.13			1	0.33
	4.5	2.64	0.49			1	0.69
	4.21	1.74	1.17			1	0.52
	3.29	1.4	0.81			1	0.67
	3.51	1.95	1.9			1	1.09
	4.83	2.12	1.44			1	0.73
	3.56	2.08	0.66			1	0.76
	3.61	2.97	0.83			1	1.05
	3.88	3.32	0.8			1	1.06
Krukal-Wallis test
Number of families	1						Table Analyzed	Fold change DAPI counts mid L3 (96hAEL)
Number of comparisons per family	3
Alpha	0.05						Column B	Post.
							vs.	vs.
Dunn's multiple comparisons test	Mean rank diff.	Significant?	Summary	Adjusted P Value			Column A	Pri.
Pri vs. Sec.	14.79	Yes	**	0.0043	A-B
Pri vs. Tert.	26.25	Yes	****	<0.0001	A-C		Unpaired t test
Sec. vs. Tert.	11.46	Yes	*	0.0402	B-C		P value	0.0093
							P value summary	**
Test details	Mean rank 1	Mean rank 2	Mean rank diff.	n1	n2		Significantly different (P < 0.05)?	Yes
Pri vs. Sec.	35.18	20.39	14.79	14	14		One- or two-tailed P value?	Two-tailed
Pri vs. Tert.	35.18	8.929	26.25	14	14		t, df	t=2.810, df=26
Sec. vs. Tert.	20.39	8.929	11.46	14	14
							How big is the difference?
							Mean of column A	1
							Mean of column B	0.8143
							Difference between means (B - A) ± SEM	-0.1857 ± 0.06608
							95% confidence interval	-0.3215 to -0.04988
							R squared (eta squared)	0.233
							F test to compare variances
							F, DFn, Dfd	Infinity, 13, 13
							P value	<0.0001
							P value summary	****
							Significantly different (P < 0.05)?	Yes
							Data analyzed
							Sample size, column A	14
							Sample size, column B	14

## Sheet: 120h AEL DAPI cell counts
96h AEL
DAPI+ nuclei x 100	pri	sec	tert.		Fold change	Pri.	Post.
	4.7	5.16	0.86			1	1.28
	1.72	1.45	1.66			1	1.8
	3.55	5.69	4.17			1	2.77
	4.93	1.75	0.81			1	0.5
	4.19	0.83	1.01			1	0.43
	6.5	9.51	7.4			1	2.6
	4.41	9.13	2.61			1	4.02
	7.18	9.63	4.79			1	2
	13.35	7.02	2.32			1	0.69
	4.37	7.67	6.92			1	3.33
	4.66	6.05	7.17			1	2.83
	4.08	2.37	0.98			1	0.82
Krukal-Wallis test								Table Analyzed	Fold change DAPI late L3 (120hAEL)
Number of families	1
Number of comparisons per family	3							Column B	Post.
Alpha	0.05							vs.	vs.
								Column A	Pri.
Dunn's multiple comparisons test	Mean rank diff.	Significant?	Summary	Adjusted P Value
Pri. vs. Sec.	-1.917	No	ns	>0.9999	A-B			Unpaired t test
Pri. vs. Tert.	6.167	No	ns	0.455	A-C			P value	0.0141
Sec. vs. Tert.	8.083	No	ns	0.1806	B-C			P value summary	*
								Significantly different (P < 0.05)?	Yes
Test details	Mean rank 1	Mean rank 2	Mean rank diff.	n1	n2			One- or two-tailed P value?	Two-tailed
Pri. vs. Sec.	19.92	21.83	-1.917	12	12			t, df	t=2.666, df=22
Pri. vs. Tert.	19.92	13.75	6.167	12	12
Sec. vs. Tert.	21.83	13.75	8.083	12	12			How big is the difference?
								Mean of column A	1
								Mean of column B	1.923
								Difference between means (B - A) ± SEM	0.9225 ± 0.3460
								95% confidence interval	0.2050 to 1.640
								R squared (eta squared)	0.2442
								F test to compare variances
								F, DFn, Dfd	Infinity, 11, 11
								P value	<0.0001
								P value summary	****
								Significantly different (P < 0.05)?	Yes
								Data analyzed
								Sample size, column A	12
								Sample size, column B	12

## Sheet: 144h AEL DAPI cell counts
96h AEL
DAPI+ nuclei x 100	pri	sec	tert.		Fold change	Pri.	Post.
	31.62	26.38	13.82			1	1.28
	19.98	30.9	7.01			1	1.89
	14.15	13.65	12.67			1	1.86
	19.65	17.51	10.99			1	1.45
	13.61	23.06	8.96			1	2.35
	25	47.61	15.2			1	2.51
	16.01	18.25	7.87			1	1.63
	13.24	9.1	11.03			1	1.52
	17.76	30.49	10.69			1	2.31
	16.77	23.69	22.4			1	2.74
	15.57	7.42	6.61			1	0.9
	14.9	34.44	23.79			1	3.9
	18.14	13.08	18.31			1	1.73
Krukal-Wallis test							Table Analyzed	Fold change DAPI counts wandering L3 (144hAEL)
Number of families	1
Number of comparisons per family	3						Column B	Post.
Alpha	0.05						vs.	vs.
							Column A	Pri.
Dunn's multiple comparisons test	Mean rank diff.	Significant?	Summary	Adjusted P Value
Pri vs. Sec.	-2.615	No	ns	>0.9999	A-B		Unpaired t test
Pri vs. Tert.	9.538	No	ns	0.0988	A-C		P value	<0.0001
Sec. vs. Tert.	12.15	Yes	*	0.0197	B-C		P value summary	****
							Significantly different (P < 0.05)?	Yes
Test details	Mean rank 1	Mean rank 2	Mean rank diff.	n1	n2		One- or two-tailed P value?	Two-tailed
Pri vs. Sec.	22.31	24.92	-2.615	13	13		t, df	t=4.700, df=24
Pri vs. Tert.	22.31	12.77	9.538	13	13
Sec. vs. Tert.	24.92	12.77	12.15	13	13		How big is the difference?
							Mean of column A	1
							Mean of column B	2.005
							Difference between means (B - A) ± SEM	1.005 ± 0.2139
							95% confidence interval	0.5639 to 1.447
							R squared (eta squared)	0.4793
							F test to compare variances
							F, DFn, Dfd	Infinity, 12, 12
							P value	<0.0001
							P value summary	****
							Significantly different (P < 0.05)?	Yes
							Data analyzed
							Sample size, column A	13
							Sample size, column B	13
