# Supplementary material for: Differential activation of JAK-STAT signaling reveals functional compartmentalization in Drosophila blood progenitors
Source: eLife. 2021 Feb 17;10:e61409. doi: 10.7554/eLife.61409 (PMC7920551; doi:10.7554/eLife.61409)
Supplement: Figure 1—figure supplement 2—source data 1. [file elife-61409-fig1-figsupp2-data1.xlsx]

## Sheet: e33c> FUCCI cell numbers
GFP+RFP-	number of cells
72h AEL Pri.	137	201	32	231	161	41	82	134	83	84	35	196	44	91	201	140	159
Sec.	45	123	8	39	75	49	40	116	83	60	21	267	25	38	195	35	161
Tert.	22	62	17	37	53	10	4	62	82	42	32	178	27	3	111	47	128
96h AEL Pri.	1014	308	225	811	835	173	142	43	314	35	83	69	138	24
Sec.	802	259	146	338	186	215	270	76	132	87	198	33	227	45
Tert.	251	210	162	113	191	116	99	42	65	44	100	67	126	32
120h AEL Pri.	161	257	263	117	339	262	261	297	72	101
Sec.	127	181	254	260	243	72	211	342	46	234
Tert.	96	135	75	215	114	66	217	173	107	153
144h AEL Pri.	357	384	239	317	643	341	322	81	143	184	156	104	210
Sec.	239	280	256	224	223	155	205	210	322	15	43	56	123
Tert.	209	111	289	100	100	174	138	57	93	7	21	8	40
RFP+ GFP-
72h AEL Pri.	115	145	54	193	142	81	124	156	76	75	58	163	158	96	101	130	124
Sec.	32	56	10	74	26	12	12	102	68	68	11	112	20	24	133	31	95
Tert.	19	19	2	32	20	2	18	20	32	10	5	78	12	9	111	17	124
96h AEL Pri.	389	677	215	83	238	287	314	305	191	73	41	154	149	96
Sec.	389	236	211	529	290	180	325	312	67	183	287	62	336	63
Tert.	452	324	97	48	176	15	117	182	59	95	182	106	73	13
120h AEL Pri.	543	292	536	277	365	215	220	297	585	293
Sec.	547	650	507	135	199	76	271	771	352	159
Tert.	551	479	1156	105	57	9	119	217	461	51
144h AEL Pri.	850	728	572	661	803	882	611	472	556	317	249	345	236
Sec.	221	360	500	164	187	226	225	328	245	39	48	76	243
Tert.	101	68	130	66	23	147	118	76	231	10	12	39	45
GFP+RFP+-
72h AEL Pri.	53	135	27	170	102	30	124	98	27	34	10	49	52	82	175	85	173
Sec.	16	37	3	21	15	4	16	41	34	27	7	36	14	11	129	17	81
Tert.	2	18	2	21	6	0	3	11	23	6	0	59	4	0	80	12	120
96h AEL Pri.	273	66	52	91	200	151	129	458	155	3	16	10	59	8
Sec.	361	70	81	155	69	57	116	352	49	52	61	22	230	15
Tert.	187	28	50	11	59	12	36	317	5	15	42	12	59	3
120h AEL Pri.	517	226	449	108	217	217	154	139	742	24
Sec.	379	355	257	188	160	227	123	205	262	94
Tert.	438	267	224	44	56	5	70	64	478	26
144h AEL Pri.	54	75	45	40	96	149	364	150	505	150	313	368	237
Sec.	22	92	73	53	112	144	89	133	172	22	49	76	220
Tert.	51	42	42	21	28	54	90	75	111	3	10	5	26

## Sheet: e33c>FUCCI percentage
Percent of cells in each phase	G1	S	G2M
Pri. 72h AEL	37.52	36.41	26.07
96h AEL	47.21	34.06	18.72
120h AEL	24.92	42.39	32.68
144h AEL	26.16	54.71	19.13
Sec. 72h AEL	49.54	32.04	18.42
96h AEL	36.87	42.45	20.68
120h AEL	28.84	44.1	27.06
144h AEL	36.34	44.23	19.43
Tert. 72h AEL	50.55	29.22	20.23
96h AEL	36.83	44.14	19.03
120h AEL	21.69	51.46	26.85
144h AEL	45.34	35.88	18.76
