# Supplementary material for: Differential activation of JAK-STAT signaling reveals functional compartmentalization in Drosophila blood progenitors
Source: eLife. 2021 Feb 17;10:e61409. doi: 10.7554/eLife.61409 (PMC7920551; doi:10.7554/eLife.61409)
Supplement: Figure 1—source data 1. [file elife-61409-fig1-data1.xlsx]

## Sheet: DAPI cell couns
pri. Lobe	60h AEL	94	98	84	89	69	78	46	66	64
	72h AEL	189	244	113	181	276	258	216	345	232	236	278	211	235
	96h AEL	351	378	331	358	264	428	450	421	329	351	483	356	361	388
	120h AEL	470	172	355	493	419	650	441	718	1335	437	466	408
	144h AEL	3162	1998	1415	1965	1361	2500	1601	1324	1776	1677	1557	1490	1814
sec. lobe	60h AEL	15	14	19	13	10	11	24	23	25
	72h AEL	106	121	28	129	138	228	121	119	115	94	128	121	126
	96h AEL	229	218	136	111	213	130	264	174	140	195	212	208	297	332
	120h AEL	516	145	569	175	83	951	913	963	702	767	605	237
	144h AEL	2638	3090	1365	1751	2306	4761	1825	910	3049	2369	742	3444	1308
Tert. lobe	60h AEL	0	0	11	5	4	0	0	14	12
	72h AEL	68	43	19	93	100	51	0	113	0	60	39	87	63
	96h AEL	155	145	84	131	84	13	49	117	81	190	144	66	83	80
	120h AEL	86	166	417	81	101	740	261	479	232	692	717	98
	144h AEL	1382	701	1267	1099	896	1520	787	1103	1069	2240	661	2379	1831

## Sheet: Ratio col-GFP positive cells
cell number (col.UASmCD8GFP/DAPI)
Pri.	Sec.	Tert.		Krukal-Wallis test
0.04	0	0.46		Table Analyzed	pcol-GFP
0.08	0	0.5
0.04	0	0.3		Kruskal-Wallis test
0.03	0	0.73		P value	<0.0001
0.04	0	0.35		Exact or approximate P value?	Approximate
0.11	0	0.25		P value summary	****
0.03	0	0.22		Do the medians vary signif. (P < 0.05)?	Yes
0.05	0	0.42		Number of groups	3
0.07	0	0.62		Kruskal-Wallis statistic	51.74
0.05	0	0.35
0.06	0	0.58		Data summary
0.05	0	0.25		Number of treatments (columns)	3
0.03	0	0.41		Number of values (total)	57
0.04	0	0.41
0.15	0	0.55
0.07	0	0.77
0.1	0	0.49
0.09	0	0.57
0.15	0	0.7

## Sheet: Ratio tep4>RFP positive cells
cell number (tep4> UAS Lifeact-RFP/DAPI)				Kruskal-wallis test
Pri.	Sec.	Tert.		Number of families	1
0.45	0.97	0.92		Number of comparisons per family	3
0.53	0.95	0.83		Alpha	0.05
0.66	0.92	0.79
0.48	0.95	0.84		Dunn's multiple comparisons test	Mean rank diff.	Significant?	Summary	Adjusted P Value
0.81	0.93	0.81		Pri. vs. Sec.	-18.41	Yes	****	<0.0001	A-B
0.73	0.96	0.89		Pri. vs. Tert.	-13.09	Yes	**	0.0044	A-C
0.46	0.79	0.85		Sec. vs. Tert.	5.318	No	ns	0.5894	B-C
0.38	0.94	0.95
0.45	0.87	0.94		Test details	Mean rank 1	Mean rank 2	Mean rank diff.	n1	n2
0.38	0.77	0.69		Pri. vs. Sec.	6.5	24.91	-18.41	11	11
0.49	0.95	0.89		Pri. vs. Tert.	6.5	19.59	-13.09	11	11
				Sec. vs. Tert.	24.91	19.59	5.318	11	11

## Sheet: Ratio Pxn-GFP positive cells
cell number (Pxn-GFP/DAPI)
Pri.	Sec.	Tert.		Krukal-Wallis test
0.38	0	0		Number of families	1
0.34	0	0		Number of comparisons per family	3
0.33	0	0		Alpha	0.05
0.23	0	0
0.14	0	0		Dunn's multiple comparisons test	Mean rank diff.	Significant?	Summary	Adjusted P Value
0.388	0	0		Pri. vs. Sec.	21.04	Yes	****	<0.0001	A-B
0.55	0	0		Pri. vs. Tert.	20.96	Yes	****	<0.0001	A-C
0.27	0	0		Sec. vs. Tert.	-0.07143	No	ns	>0.9999	B-C
0.39	0	0
0.3	0	0		Test details	Mean rank 1	Mean rank 2	Mean rank diff.	n1	n2
0.22	0	0		Pri. vs. Sec.	35.5	14.46	21.04	14	14
0.25	0	0		Pri. vs. Tert.	35.5	14.54	20.96	14	14
0.39	0.05	0.06		Sec. vs. Tert.	14.46	14.54	-0.07143	14	14
0.32	0	0

## Sheet: Ratio dome-GFP positive cells
cell number (dome-Gal4 UAS2xEGFP/DAPI)				Krukal-Wallis test
Pri.	Sec.	Tert.		Number of families	1
0.72	0.76	0.8		Number of comparisons per family	3
0.74	0.67	0.66		Alpha	0.05
0.89	0.66	0
0.65	0.77	0.23		Dunn's multiple comparisons test	Mean rank diff.	Significant?	Summary	Adjusted P Value
0.78	0.86	0.11		Pri. vs. Sec.	-2.647	No	ns	>0.9999	A-B
0.63	0.75	0.37		Pri. vs. Tert.	21.26	Yes	****	<0.0001	A-C
0.76	0.77	0		Sec. vs. Tert.	23.91	Yes	****	<0.0001	B-C
0.74	0.64	0.38
0.68	0.86	0.4		Test details	Mean rank 1	Mean rank 2	Mean rank diff.	n1	n2
0.9	0.86	0.58		Pri. vs. Sec.	32.21	34.85	-2.647	17	17
0.84	0.61	0		Pri. vs. Tert.	32.21	10.94	21.26	17	17
0.72	0.65	0.39		Sec. vs. Tert.	34.85	10.94	23.91	17	17
0.64	0.75	0.58
0.72	0.75	0.44
0.82	0.97	0.19
0.65	0.74	0.22
0.67	0.8	0.32

## Sheet: Ratio P1 positive cells
cell number (P1/DAPI)
Pri.	Sec.	Tert.		Krukal-Wallis test
0.52	0	0		Dunn's multiple comparisons test	Mean rank diff.	Significant?	Summary	Adjusted P Value
0.5	0.05	0.04		Pri. vs. Sec.	23.53	Yes	****	<0.0001	A-B
0.62	0	0		Pri. vs. Tert.	27.47	Yes	****	<0.0001	A-C
0.49	0.04	0		Sec. vs. Tert.	3.941	No	ns	>0.9999	B-C
0.37	0	0
0.64	0	0		Test details	Mean rank 1	Mean rank 2	Mean rank diff.	n1	n2
0.63	0.15	0		Pri. vs. Sec.	43	19.47	23.53	17	17
0.36	0	0.01		Pri. vs. Tert.	43	15.53	27.47	17	17
0.38	0	0		Sec. vs. Tert.	19.47	15.53	3.941	17	17
0.42	0.02	0.03
0.52	0	0
0.32	0.07	0
0.37	0.02	0
0.49	0.04	0.02
0.38	0	0
0.35	0	0
0.55	0	0

## Sheet: Ratio DEcad positive cells
cell number (DEcad/DAPI)
Pri.	Sec.	Tert.		Krukal-Wallis test
0.31	0.95	0.67		Number of families	1
0.54	0.98	0.71		Number of comparisons per family	3
0.34	0.97	0.92		Alpha	0.05
0.63	0.94	0.37
0.65	0.98	0.64		Dunn's multiple comparisons test	Mean rank diff.	Significant?	Summary	Adjusted P Value
0.55	0.95	0.8		Pri. vs. Sec.	-24.3	Yes	****	<0.0001	A-B
0.31	0.9	0.93		Pri. vs. Tert.	-15	Yes	**	0.0036	A-C
0.44	0.98	0.97		Sec. vs. Tert.	9.32	No	ns	0.132	B-C
0.53	0.98	1
0.6	0.98	0.92		Test details	Mean rank 1	Mean rank 2	Mean rank diff.	n1	n2
0.59	0.94	0.81		Pri. vs. Sec.	8.39	32.7	-24.3	14	14
0.53	0.96	0.99		Pri. vs. Tert.	8.39	23.4	-15	14	14
0.42	0.98	0.65		Sec. vs. Tert.	32.7	23.4	9.32	14	14
0.49	0.97	0.92

## Sheet: Tep4>FUCCI cell numbers
GFP+RFP-	number of cells
72h AEL Pri.	2	9	12	37	50	6	5	0	0	13	22	25	5	3
Sec.	7	9	32	7	17	12	10	4	0	13	22	37	10	13
Tert.	6	0	22	2	13	4	2	0	3	2	29	12	12	0
96h AEL Pri.	3	0	10	22	13	27	5	0	0	0
Sec.	61	2	23	67	12	35	5	76	28	128
Tert.	74	6	11	26	17	32	14	7	11	53
120h AEL Pri.	10	13	27	11	4	19	7	0	21	0	23	16	3
Sec.	23	162	159	113	88	179	142	202	132	54	99	25	46
Tert.	97	37	55	43	26	74	83	67	19	1	7	10	17
144h AEL Pri.	59	19	83	57	21	39	11	25	39	28	15	46	95	107	16
Sec.	60	18	26	102	111	36	3	47	30	26	10	34	28	53	17
Tert.	3	17	0	2	16	1	1	12	6	17	0	6	17	25	14
RFP+GFP-
72h AEL Pri.	59	44	144	86	181	72	40	13	51	84	108	116	55	41
Sec.	12	9	46	4	14	14	6	3	16	3	19	22	20	3
Tert.	2	0	32	3	8	5	5	1	0	0	18	6	7	0
96h AEL Pri.	111	43	54	65	34	133	62	53	116	325
Sec.	65	4	21	35	18	18	19	60	77	305
Tert.	35	0	5	7	9	11	12	7	19	117
120h AEL Pri.	72	65	180	87	72	280	132	315	452	166	269	161	230
Sec.	76	102	206	158	200	361	421	520	547	116	252	95	134
Tert.	139	34	47	42	48	177	227	167	103	10	18	19	14
144h AEL Pri.	282	423	341	271	240	267	163	201	174	200	308	238	303	181	250
Sec.	122	97	154	226	300	208	118	139	82	94	51	89	147	163	170
Tert.	61	47	36	8	81	22	134	55	26	99	2	12	96	134	115
GFP+RFP+
72h AEL Pri.	0	7	8	17	19	7	3	0	3	16	18	19	6	3
Sec.	7	4	21	1	15	5	1	1	0	4	7	9	2	2
Tert.	0	0	3	0	6	2	1	0	1	0	6	0	0	0
96h AEL Pri.	8	0	2	11	4	21	4	0	0	0
Sec.	33	2	12	25	6	13	8	16	11	62
Tert.	30	1	3	7	1	2	3	0	1	15
120h AEL Pri.	5	14	26	5	23	11	2	0	93	0	12	28	4
Sec.	21	107	86	92	80	105	259	388	751	70	144	25	40
Tert.	43	12	10	11	12	40	99	80	30	1	0	3	5
144h AEL Pri.	177	46	107	74	87	104	373	138	260	258	245	116	66	238	276
Sec.	176	49	157	137	341	107	376	182	200	394	204	132	262	316	360
Tert.	4	28	0	1	45	3	84	14	17	22	0	15	16	72	201

## Sheet: Tep4>FUCCI percent 
Percent of cells in each phase	G1	S	G2M
Pri. 72h AEL	13.41	77.64	8.94
96h AEL	7.1	88.45	4.44
120h AEL	5.47	86.61	7.92
144h AEL	9.34	54.36	36.3
Sec. 72h AEL	41.68	41.25	17.06
96h AEL	35.04	49.88	15.06
120h AEL	21	47.01	31.98
144h AEL	9.77	35.1	55.13
Tert. 72h AEL	50.23	40.85	8.92
96h AEL	46.83	41.42	11.75
120h AEL	27.82	54.22	17.96
144h AEL	8.63	58.48	32.89
