# Supplementary material for: Differential activation of JAK-STAT signaling reveals functional compartmentalization in Drosophila blood progenitors
Source: eLife. 2021 Feb 17;10:e61409. doi: 10.7554/eLife.61409 (PMC7920551; doi:10.7554/eLife.61409)
Supplement: Figure 3—source data 1. [file elife-61409-fig3-data1.xlsx]

## Sheet: CantonS pupla LG histolysis
	0hr APF					5hr APF				10hr APF					15hr APF
	Pri lobe (N= 9)					Pri lobe (N= 13 )					Pri lobe (N= 15 )					Pri lobe (N= 12 )
	Histolyzed	Histolyzing	intact			Histolyzed	Histolyzing	intact			Histolyzed	Histolyzing	intact			Histolyzed	Histolyzing	intact
number of LG	0	4	5		number of LG	5	8	0		number of LG	13	2	0		number of LG	12	0	0
percentage	0	44.45	55.55		percentage	38.46	61.54	0		percentage	86.66	13.34	0		percentage	100	0	0
	Sec. lobe					Sec. lobe					Sec. lobe					Sec. lobe
	Histolyzed	Histolyzing	intact			Histolyzed	Histolyzing	intact			Histolyzed	Histolyzing	intact			Histolyzed	Histolyzing	intact
number of LG	0	0	9		number of LG	0	6	7		number of LG	0	9	6		number of LG	7	5	0
percentage	0	0	100		percentage	0	46.15	53.85		percentage	0	60	40		percentage	58.34	41.66	0
	Tert. lobe					Tert. lobe					Tert. lobe					Tert. lobe
	Histolyzed	Histolyzing	intact			Histolyzed	Histolyzing	intact			Histolyzed	Histolyzing	intact			Histolyzed	Histolyzing	intact
number of LG	0	0	9		number of LG	0	0	13		number of LG	0	4	11		number of LG	5	7	0
percentage	0	0	100		percentage	0	0	100		percentage	0	26.66	73.34		percentage	41.66	58.34	0

## Sheet: 5h APF col-GFP
cell number (col.UASmCD8GFP/DAPI)
5h APF	Pri.	Sec.	Tert.
	0.05	0	0.39
		0	0.54
		0	0.55
	0.11	0	0.83
		0	0.51
		0	0.59
	0.1	0	0.39
Krukal-Wallis test					5hAPF
Number of families	1
Number of comparisons per family	3
Alpha	0.05
Dunn's multiple comparisons test	Mean rank diff.	Significant?	Summary	Adjusted P Value
Pri. vs. Sec.	5	No	ns	0.4104	A-B
Pri. vs. Tert.	-5	No	ns	0.4104	A-C
Sec. vs. Tert.	-10	Yes	***	0.0004	B-C
Test details	Mean rank 1	Mean rank 2	Mean rank diff.	n1	n2
Pri. vs. Sec.	9	4	5	3	7
Pri. vs. Tert.	9	14	-5	3	7
Sec. vs. Tert.	4	14	-10	7	7

## Sheet: 10h APF col-GFP
cell number (col.UASmCD8GFP/DAPI)
10h APF	Pri.	Sec.	Tert.
		0	0.45
	0.16	0.01	0.6
		0	0.5
		0	0.48
	0.24	0	0.36
		0	0.64
		0	0.5
		0.04	0.21
Krukal-Wallis test
Number of families	1
Number of comparisons per family	3
Alpha	0.05
Dunn's multiple comparisons test	Mean rank diff.	Significant?	Summary	Adjusted P Value
Pri. vs. Sec.	5.5	No	ns	0.5525	A-B
Pri. vs. Tert.	-4.375	No	ns	0.8723	A-C
Sec. vs. Tert.	-9.875	Yes	***	0.0005	B-C
Test details	Mean rank 1	Mean rank 2	Mean rank diff.	n1	n2
Pri. vs. Sec.	10	4.5	5.5	2	8
Pri. vs. Tert.	10	14.38	-4.375	2	8
Sec. vs. Tert.	4.5	14.38	-9.875	8	8

## Sheet: 5h APF tep4>UAS-RFP
cell number (tep4> UAS Lifeact-RFP/DAPI)
5h APF	Pri.	Sec.	Tert.
	0.4	0.92	0.48
	0.69	0.81	0.41
		0.77	0.89
	0.79	0.66	0.54
		0.76	0.51
		0.8	0.25
	0.41	0.69	0.44
		0.77	0.4
Krukal-Wallis test
Number of families	1
Number of comparisons per family	3
Alpha	0.05
Dunn's multiple comparisons test	Mean rank diff.	Significant?	Summary	Adjusted P Value
Pri. vs. Sec.	-6.188	No	ns	0.2615	A-B
Pri. vs. Tert.	1.5	No	ns	>0.9999	A-C
Sec. vs. Tert.	7.688	Yes	*	0.0277	B-C
Test details	Mean rank 1	Mean rank 2	Mean rank diff.	n1	n2
Pri. vs. Sec.	8.625	14.81	-6.188	4	8
Pri. vs. Tert.	8.625	7.125	1.5	4	8
Sec. vs. Tert.	14.81	7.125	7.688	8	8

## Sheet: 5h APF Pxn-GFP
cell number (Pxn-GFP/DAPI)
5h APF	Pri.	Sec.	Tert.
	0	0	0
	0	0	0
	0.17	0.11	0.04
		0.12	0.02
		0.09	0.01
	0.02	0.03	0.005
		0.006	0.01
Krukal-Wallis test
Number of families	1
Number of comparisons per family	3
Alpha	0.05
Dunn's multiple comparisons test	Mean rank diff.	Significant?	Summary	Adjusted P Value
Pri. vs. Sec.	-1.732	No	ns	>0.9999	A-B
Pri. vs. Tert.	0.7679	No	ns	>0.9999	A-C
Sec. vs. Tert.	2.5	No	ns	>0.9999	B-C
Test details	Mean rank 1	Mean rank 2	Mean rank diff.	n1	n2
Pri. vs. Sec.	9.125	10.86	-1.732	4	7
Pri. vs. Tert.	9.125	8.357	0.7679	4	7
Sec. vs. Tert.	10.86	8.357	2.5	7	7

## Sheet: 10h APF tep4>UAS-RFP
cell number (tep4> UAS Lifeact-RFP/DAPI)
10h APF		Pri.	Sec.	Tert.
			0.78	0.59
			0.85	0.72
			0.83	0.67
		0.12	0.84	0.56
		0.2	0.8	0.44
			0.31	0.58
		0.42	0.77	0.37
			0.46	0.46
			0.62	0.64
Krukal-Wallis test
Number of families	1
Number of comparisons per family	3
Alpha	0.05
Dunn's multiple comparisons test	Mean rank diff.	Significant?	Summary	Adjusted P Value
Pri. vs. Sec.	-12.17	Yes	**	0.0098	A-B
Pri. vs. Tert.	-7.278	No	ns	0.2352	A-C
Sec. vs. Tert.	4.889	No	ns	0.2836	B-C
Test details	Mean rank 1	Mean rank 2	Mean rank diff.	n1	n2
Pri. vs. Sec.	2.667	14.83	-12.17	3	9
Pri. vs. Tert.	2.667	9.944	-7.278	3	9
Sec. vs. Tert.	14.83	9.944	4.889	9	9

## Sheet: 10h APF Pxn-GFP
cell number (Pxn-GFP/DAPI)
10h APF	Pri.	Sec.	Tert.
		0.08	0.03
		0.05	0.06
		0.3	0
	0.06	0.13	0.01
	0.15	0.07	0.009
		0.001	0
	0.13	0.16	0.017
		0	0
		0.005	0
Krukal-Wallis test
Number of families	1
Number of comparisons per family	3
Alpha	0.05
Dunn's multiple comparisons test	Mean rank diff.	Significant?	Summary	Adjusted P Value
Pri. vs. Sec.	3.611	No	ns	>0.9999	A-B
Pri. vs. Tert.	9.611	No	ns	0.0578	A-C
Sec. vs. Tert.	6	No	ns	0.1165	B-C
Test details	Mean rank 1	Mean rank 2	Mean rank diff.	n1	n2
Pri. vs. Sec.	16.67	13.06	3.611	3	9
Pri. vs. Tert.	16.67	7.056	9.611	3	9
Sec. vs. Tert.	13.06	7.056	6	9	9

## Sheet: 5h APF dome>UAS-GFP
cell number (dome-Gal4 UAS2xEGFP/DAPI)
5h APF	Pri.	Sec.	Tert.
	0.89	0.63	0.38
	0.39	0.54	0.73
	0.28	0.36	0.7
	0.82	0.7	0.53
	0.24	0.43	0.5
	0.75	0.76	0.39
	0.9	0.59	0
	0.74	0.83	0.38
	0.44	0.54	0.37
	0.48	0.42	0.29
	0.44	0.46	0.19
Krukal-Wallis test
Number of families	1
Number of comparisons per family	3
Alpha	0.05
Dunn's multiple comparisons test	Mean rank diff.	Significant?	Summary	Adjusted P Value
Pri. vs. Sec.	-0.3636	No	ns	>0.9999	A-B
Pri. vs. Tert.	7.591	No	ns	0.1965	A-C
Sec. vs. Tert.	7.955	No	ns	0.1608	B-C
Test details	Mean rank 1	Mean rank 2	Mean rank diff.	n1	n2
Pri. vs. Sec.	19.41	19.77	-0.3636	11	11
Pri. vs. Tert.	19.41	11.82	7.591	11	11
Sec. vs. Tert.	19.77	11.82	7.955	11	11

## Sheet: 5h APF P1
cell number (P1/DAPI)
5h APF	Pri.	Sec.	Tert.
	0.01	0	0.01
	0.018	0.022	0.003
	0.03	0.012	0
	0.06	0.007	0.03
	0.08	0	0
	0.005	0	0
	0.026	0	0
	0.01	0.005	0.01
	0.11	0.019	0.008
	0.06	0.026	0.005
	0.14	0.009	0.017
Krukal-Wallis test
Number of families	1
Number of comparisons per family	3
Alpha	0.05
Dunn's multiple comparisons test	Mean rank diff.	Significant?	Summary	Adjusted P Value
Pri. vs. Sec.	11.5	Yes	*	0.0147	A-B
Pri. vs. Tert.	12.77	Yes	**	0.0053	A-C
Sec. vs. Tert.	1.273	No	ns	>0.9999	B-C
Test details	Mean rank 1	Mean rank 2	Mean rank diff.	n1	n2
Pri. vs. Sec.	25.09	13.59	11.5	11	11
Pri. vs. Tert.	25.09	12.32	12.77	11	11
Sec. vs. Tert.	13.59	12.32	1.273	11	11

## Sheet: 10h APF dome>UAS-GFP
cell number (dome-Gal4 UAS2xEGFP/DAPI)
10h APF	Pri.	Sec.	Tert.
	0.81	0.56	0.29
	0.88	0.75	0.1
	0.9	0.62	0.19
	0.79	0.83	0.4
	0.82	0.82	0.34
	0.77	0.72	0.17
	0.48	0.42	0.23
		0.23	0.45
		0.06	0.11
	0.74	0.63	0.21
Krukal-Wallis test
Number of families	1
Number of comparisons per family	3
Alpha	0.05
Dunn's multiple comparisons test	Mean rank diff.	Significant?	Summary	Adjusted P Value
Pri. vs. Sec.	6.613	No	ns	0.2701	A-B
Pri. vs. Tert.	15.26	Yes	***	0.0003	A-C
Sec. vs. Tert.	8.65	No	ns	0.056	B-C
Test details	Mean rank 1	Mean rank 2	Mean rank diff.	n1	n2
Pri. vs. Sec.	22.31	15.7	6.613	8	10
Pri. vs. Tert.	22.31	7.05	15.26	8	10
Sec. vs. Tert.	15.7	7.05	8.65	10	10

[truncated: 1 more sheets: 10h APF P1]
