# Supplementary material for: Differential activation of JAK-STAT signaling reveals functional compartmentalization in Drosophila blood progenitors
Source: eLife. 2021 Feb 17;10:e61409. doi: 10.7554/eLife.61409 (PMC7920551; doi:10.7554/eLife.61409)
Supplement: Figure 4—figure supplement 1—source data 1. [file elife-61409-fig4-figsupp1-data1.xlsx]

## Sheet: Ration Pxn positive cells 
cell numbers (Pxn/DAPI)
	Uninfected				infected E.coli
	Pri.	sec.	Tert.		Pri.	sec.	Tert.
	0.22	0	0		0.5	0	0
	0.13	0	0		0.56	0	0
	0.28	0	0		0.59	0	0
	0.28	0	0		0.43	0	0
	0.16	0	0		0.4	0	0
	0.36	0	0		0.4	0	0
	0.38	0	0		0.54	0	0
					0.42	0	0
					0.61	0	0
Pri uninfected vs infected	Pri. E.coli
	vs.
	Pri. uninfected
Mann Whitney test
P value	0.0002
Exact or approximate P value?	Exact
P value summary	***
Significantly different (P < 0.05)?	Yes
One- or two-tailed P value?	Two-tailed
Sum of ranks in column A,B	28 , 108
Mann-Whitney U	0
Difference between medians
Median of column A	0.2800, n=7
Median of column B	0.5000, n=9
Difference: Actual	0.22
Difference: Hodges-Lehmann	0.24

## Sheet: 2day post parsitism
lamellocyte morphology
CantonS	0	1-25	> 25
Pri.	21.42	42.85	35.71
sec.	100	0	0
Tert.	100	0	0
