# Supplementary material for: Differential activation of JAK-STAT signaling reveals functional compartmentalization in Drosophila blood progenitors
Source: eLife. 2021 Feb 17;10:e61409. doi: 10.7554/eLife.61409 (PMC7920551; doi:10.7554/eLife.61409)
Supplement: Figure 4—figure supplement 2—source data 1. [file elife-61409-fig4-figsupp2-data1.xlsx]

## Sheet: Antp cell counts
Antp+ cell numbers
	Antp	Antp> UAS-Reaper		Mann Whitney test
	82	0		P value	<0.0001
	123	0		Exact or approximate P value?	Exact
	112	0		P value summary	****
	60	0		Significantly different (P < 0.05)?	Yes
	134	0		One- or two-tailed P value?	Two-tailed
	84	0		Sum of ranks in column A,B	234 , 91
	95	0		Mann-Whitney U	0
	83	0
	43	0		Difference between medians
	48	0		Median of column A	83.50, n=12
	62	0		Median of column B	0.000, n=13
	101	0		Difference: Actual	-83.5
		0		Difference: Hodges-Lehmann	-83.5

## Sheet: PSC ablation LG morphology 
LG histolysis		Histolyzed lobes	Histolyzing lobes	intact lobes
	Antp-Gal4
	Pri.	25	66.66	8.33
	Sec.	0	0	100
	Tert.	0	0	100
	Antp>UAS-rpr
	Pri.	0	0	100
	Sec.	0	0	100
	Tert.	0	0	100
lamellocyte differentiation		0	1-25	>25
	Antp-Gal4
	Pri.	33.33	58.33	8.33
	Sec.	100	0	0
	Tert.	100	0	0
	Antp>UAS-rpr
	Pri.	100	0	0
	Sec.	100	0	0
	Tert.	100	0	0
cell coalescence		0	1-25	>25
	Antp-Gal4
	Pri.	100	0	0
	Sec.	58.33	41.66	0
	Tert.	8.33	58.33	33.33
	Antp>UAS-rpr
	Pri.	100	0	0
	Sec.	100	0	0
	Tert.	100	0	0
