# Supplementary material for: Differential activation of JAK-STAT signaling reveals functional compartmentalization in Drosophila blood progenitors
Source: eLife. 2021 Feb 17;10:e61409. doi: 10.7554/eLife.61409 (PMC7920551; doi:10.7554/eLife.61409)
Supplement: Figure 4—source data 1. [file elife-61409-fig4-data1.xlsx]

## Sheet: Cell morphology_phalloidin
CantonS
phenotypes on the basis of
Phalloidin	LG histolysis				lamellocyte morphology				cell coalesced
	histolyzed	histolyzing	intact		0	1-25	> 25		0	1-25	>25
	6.13	79.59	14.28		70.83	18.75	10.41		89.58	6.25	4.16
	0	0	100		70.83	27.08	2.08		64.58	25	10.41
	0	0	100		89.58	8.33	2.08		75	22.91	2.08

## Sheet: cell morphology_msnF9mcherry
phenotypes on the basis of
MSNF9mcherry
	LG histolysis				Total MSNF9 positive cells
	histolyzed	histolyzing	intact		0	1-25	> 25
	5.88	70.59	23.52		18.75	43.75	37.5
	0	5.88	94.12		62.5	31.25	6.25
	0	0	100		43.75	56.25	0
					lamellocyte morphology (MSNF9 positive)				round cells (MSNF9 positive)
					0	1-25	> 25		0	1-25	>25
					75	12.5	12.5		25	50	25
					81.25	12.5	6.25		68.75	31.25	0
					87.5	12.5	0		50	50	0
