# Supplementary material for: Differential activation of JAK-STAT signaling reveals functional compartmentalization in Drosophila blood progenitors
Source: eLife. 2021 Feb 17;10:e61409. doi: 10.7554/eLife.61409 (PMC7920551; doi:10.7554/eLife.61409)
Supplement: Figure 5—figure supplement 1—source data 1. [file elife-61409-fig5-figsupp1-data1.xlsx]

## Sheet: 10xSTAT-GFP MFI 2day 
10xSTAT-GFP MFI
2days post-parasitism	unparasitized	parasitzed	unparasitized	parasitzed	unparasitized	parasitzed		pri. Lobes unparasitized vs parasitized
	Pri.	Pri.	Sec	Sec.	Tert.	Tert.		Mann Whitney test
	9.1	4.05	21.22	17.65	20.9	26.14		P value	0.0256
	5.8	2.7	10.7	11.6	18.15	27.83		Exact or approximate P value?	Exact
	5.2	5.25	9.3	32.95	15.6	44.3		P value summary	*
	4.95	2.65	14.2	12.65	13.7	21.15		Significantly different (P < 0.05)?	Yes
	6.3	3	12.83	9.5	11.66	16.87		One- or two-tailed P value?	Two-tailed
	6	3.55	11.13	9.75	6.25	10.9		Sum of ranks in column A,B	67 , 53
		6.13		8.85		11.34		Mann-Whitney U	8
		5.6		9.3		15.41
		4.55		11.1		11		Difference between medians
								Median of column A	5.900, n=6
								Median of column B	4.050, n=9
								Difference: Actual	-1.85
								Difference: Hodges-Lehmann	-2.075
								sec. Lobes unparasitized vs parasitized
								Mann Whitney test
								P value	0.5497
								Exact or approximate P value?	Exact
								P value summary	ns
								Significantly different (P < 0.05)?	No
								One- or two-tailed P value?	Two-tailed
								Sum of ranks in column C,D	53.50 , 66.50
								Mann-Whitney U	21.5
								Difference between medians
								Median of column C	11.98, n=6
								Median of column D	11.10, n=9
								Difference: Actual	-0.88
								Difference: Hodges-Lehmann	-1.215
								tert. Lobes unparasitized vs parasitized
								Mann Whitney test
								P value	0.4559
								Exact or approximate P value?	Exact
								P value summary	ns
								Significantly different (P < 0.05)?	No
								One- or two-tailed P value?	Two-tailed
								Sum of ranks in column E,F	41 , 79
								Mann-Whitney U	20
								Difference between medians
								Median of column E	14.65, n=6
								Median of column F	16.87, n=9
								Difference: Actual	2.22
								Difference: Hodges-Lehmann	4.7

## Sheet: 10xSTAT-GFP MFI 3day 
10xSTAT-GFP MFI
3 days post-parasitism	unparasitized	parasitzed	unparasitized	parasitzed	unparasitized	parasitzed		pri. Lobes unparasitized vs parasitized
	Pri.	Pri.	Sec	Sec.	Tert.	Tert.		Mann Whitney test
	9.4	6.6	13.25	14.3	10.82	44.9		P value	0.1567
	7.63	6.8	16.8	21.95	15.26	36.22		Exact or approximate P value?	Exact
	8.4	6.3	9.25	15.4	8.88	22.85		P value summary	ns
	7.25	4.1	11.26	11.62	13.5	18.15		Significantly different (P < 0.05)?	No
	5.5	6.33	11.15	30.1	14.16	44.96		One- or two-tailed P value?	Two-tailed
	5	5.55	14.3	11.6	23.45	28.45		Sum of ranks in column A,B	101 , 152
	4.3	3.45	15.8	19.33	21.04	22.3		Mann-Whitney U	32
		5		19.37		44.66
		7.3		33.42		52.6		Difference between medians
		6.6		24.6		47.78		Median of column A	7.250, n=7
		6.7		39.15		51.25		Median of column B	6.300, n=15
		7.6		19.7		41.76		Difference: Actual	-0.95
		4.2		10.57		15.23		Difference: Hodges-Lehmann	-1.03
		4.3		14.42		20.3
		4.4		16.5		19.7		sec. Lobes unparasitized vs parasitized
								Mann Whitney test
								P value	0.0273
								Exact or approximate P value?	Exact
								P value summary	*
								Significantly different (P < 0.05)?	Yes
								One- or two-tailed P value?	Two-tailed
								Sum of ranks in column C,D	49.50 , 203.5
								Mann-Whitney U	21.5
								Difference between medians
								Median of column C	13.25, n=7
								Median of column D	19.33, n=15
								Difference: Actual	6.08
								Difference: Hodges-Lehmann	5.15
								tert. Lobes unparasitized vs parasitized
								Mann Whitney test
								P value	0.0021
								Exact or approximate P value?	Exact
								P value summary	**
								Significantly different (P < 0.05)?	Yes
								One- or two-tailed P value?	Two-tailed
								Sum of ranks in column E,F	39 , 214
								Mann-Whitney U	11
								Difference between medians
								Median of column E	14.16, n=7
								Median of column F	36.22, n=15
								Difference: Actual	22.06
								Difference: Hodges-Lehmann	20.72

## Sheet: domeMESO-GFP MFI 2 day
2 day post-parastism
Mean fluorescence intensity (MFI)	Unparasitized	Parasitized	Unparasitized	Parasitized	Unparasitized	Parasitized		Comparison pri. Lobes unparasitizd vs parasitized
domeMESO-GFP	pri.	pri.	sec.	sec.	tert.	tert.		Mann Whitney test
	32.75	17.18	0	36.61	0	0		P value	0.3837
	46.25	42.21	0	19.74	0	0		Exact or approximate P value?	Exact
	34.09	51.45	0	9.86	0	0		P value summary	ns
	33.53	21.73	4.13	20.28	0	0		Significantly different (P < 0.05)?	No
	31.26	36	0	0	0	0		One- or two-tailed P value?	Two-tailed
	26.07	30.05	0	27.96	0	0		Sum of ranks in column A,B	96 , 114
	29.2	53.73	1.75	17.01	0	0		Mann-Whitney U	36
	30.3	16.66	5.92	37.98	0	3.39
		29.11		16.03		5.35		Difference between medians
		27.17		0		0		Median of column A	32.01, n=8
		19.25		0		0		Median of column B	29.34, n=12
		29.57		5.44		0		Difference: Actual	-2.665
								Difference: Hodges-Lehmann	-3.56
								Comparison sec. Lobes unparasitizd vs parasitized
								Mann Whitney test
								P value	0.0135
								Exact or approximate P value?	Exact
								P value summary	*
								Significantly different (P < 0.05)?	Yes
								One- or two-tailed P value?	Two-tailed
								Sum of ranks in column C,D	53.50 , 156.5
								Mann-Whitney U	17.5
								Difference between medians
								Median of column C	0.000, n=8
								Median of column D	16.52, n=12
								Difference: Actual	16.52
								Difference: Hodges-Lehmann	15.44

## Sheet: Ratio domeMESO-GFP 2day
2 day post-parastism									Comparison pri. Lobes unparasitizd vs parasitized			Comparison tert. Lobes unparasitizd vs parasitized
Cell numbers (doemMESO-GFP/ DAPI)									Mann Whitney test			Mann Whitney test
	unparasitized				parasitized				P value	0.8355		P value	0.4947
	Pri.	Sec.	Tert.		Pri.	Sec.	Tert.		Exact or approximate P value?	Exact		Exact or approximate P value?	Exact
	0.56	0	0		0.6	0.5	0		P value summary	ns		P value summary	ns
	0.74	0.003	0		0.73	0.44	0		Significantly different (P < 0.05)?	No		Significantly different (P < 0.05)?	No
	0.65	0	0		0.65	0.16	0		One- or two-tailed P value?	Two-tailed		One- or two-tailed P value?	Two-tailed
	0.54	0.06	0		0.37	0.34	0		Sum of ranks in column A,B	81 , 129		Sum of ranks in column E,F	76 , 134
	0.44	0	0		0.68	0	0		Mann-Whitney U	45		Mann-Whitney U	40
	0.47	0	0		0.75	0.61	0
	0.69	0	0		0.58	0.39	0		Difference between medians			Difference between medians
	0.57	0.18	0		0.46	0.46	0.07		Median of column A	0.5650, n=8		Median of column E	0.000, n=8
					0.47	0.3	0.14		Median of column B	0.6150, n=12		Median of column F	0.000, n=12
					0.63	0	0		Difference: Actual	0.05		Difference: Actual	0
					0.52	0.04	0		Difference: Hodges-Lehmann	0.015		Difference: Hodges-Lehmann	0
					0.63	0.12	0
									Comparison sec. Lobes unparasitizd vs parasitized
									Mann Whitney test
									P value	0.0083
									Exact or approximate P value?	Exact
									P value summary	**
									Significantly different (P < 0.05)?	Yes
									One- or two-tailed P value?	Two-tailed
									Sum of ranks in column C,D	51 , 159
									Mann-Whitney U	15
									Difference between medians
									Median of column C	0.000, n=8
									Median of column D	0.3200, n=12
									Difference: Actual	0.32
									Difference: Hodges-Lehmann	0.2985

## Sheet: Ratio domeMESO-GFP 4 day
4 day post-parastism	unparasitized				parasitized				Comparison pri. Lobes unparasitizd vs parasitized				Comparison tert. Lobes unparasitizd vs parasitized
Cell numbers (doemMESO-GFP/ DAPI)	Pri.	Sec.	Tert.		Pri.	Sec.	Tert.		Mann Whitney test				Mann Whitney test
	0.12	0	0		0.58	0.66	0.1		P value	0.7114			P value	0.0056
	0.63	0.11	0		0.32	0.25	0.55		Exact or approximate P value?	Exact			Exact or approximate P value?	Exact
	0.43	0.08	0.01		0.38	0.45	0		P value summary	ns			P value summary	**
	0.25	0.06	0.02		0.52	0.17	0.06		Significantly different (P < 0.05)?	No			Significantly different (P < 0.05)?	Yes
	0.46	0.07	0		0.56	0.21	0		One- or two-tailed P value?	Two-tailed			One- or two-tailed P value?	Two-tailed
	0.33	0.09	0		0.23	0.21	0.14		Sum of ranks in column H,I	71.50 , 99.50			Sum of ranks in column L,M	48 , 142
	0.46	0.08	0.02		0.56	0.28	0.05		Mann-Whitney U	35.5			Mann-Whitney U	12
	0.58	0.13	0		0.56	0.39	0.23
					0.51	0.27	0.02		Difference between medians				Difference between medians
					disintegrated	0.46	0.22		Median of column H	0.4450, n=8			Median of column L	0.000, n=8
									Median of column I	0.5150, n=10			Median of column M	0.1000, n=11
									Difference: Actual	0.07			Difference: Actual	0.1
									Difference: Hodges-Lehmann	0.06			Difference: Hodges-Lehmann	0.1
									Comparison sec. Lobes unparasitizd vs parasitized
									Mann Whitney test
									P value	<0.0001
									Exact or approximate P value?	Exact
									P value summary	****
									Significantly different (P < 0.05)?	Yes
									One- or two-tailed P value?	Two-tailed
									Sum of ranks in column J,K	36 , 154
									Mann-Whitney U	0
									Difference between medians
									Median of column J	0.08000, n=8
									Median of column K	0.2800, n=11
									Difference: Actual	0.2
									Difference: Hodges-Lehmann	0.215
