# Supplementary material for: Differential activation of JAK-STAT signaling reveals functional compartmentalization in Drosophila blood progenitors
Source: eLife. 2021 Feb 17;10:e61409. doi: 10.7554/eLife.61409 (PMC7920551; doi:10.7554/eLife.61409)
Supplement: Figure 5—figure supplement 2—source data 1. [file elife-61409-fig5-figsupp2-data1.xlsx]

## Sheet: Pseudomonas infection
10xSTAT-GFP	uninfected		infected
Mean fuorescence intensity (MFI)	Pri.	Post.	Pri.	Post.		Pri uninfected vs infected	pri. PE			Post uninfected vs infected	post. PE
uninfected vs Pseudomonas entemophila infection	9.567	20.21	14.26	16.5			vs.				vs.
	13.75	21	11.5	16.41			pri cltr				post. cltr
	9.5	16.3	15.1	11.9
	10.25	11.8	10	17.12		Mann Whitney test				Mann Whitney test
	10.95	17.94	11.8	13.67		P value	0.4747			P value	>0.9999
	18.15	16.3	6.1	11.78		Exact or approximate P value?	Exact			Exact or approximate P value?	Exact
	10.93	11.95	14.85	32.98		P value summary	ns			P value summary	ns
			20.97	14.11		Significantly different (P < 0.05)?	No			Significantly different (P < 0.05)?	No
			5.55	17.65		One- or two-tailed P value?	Two-tailed			One- or two-tailed P value?	Two-tailed
			14.35	24.99		Sum of ranks in column A,B	55 , 98			Sum of ranks in column C,D	63 , 90
						Mann-Whitney U	27			Mann-Whitney U	35
						Difference between medians				Difference between medians
						Median of column A	10.93, n=7			Median of column C	16.30, n=7
						Median of column B	13.03, n=10			Median of column D	16.46, n=10
						Difference: Actual	2.1			Difference: Actual	0.155
						Difference: Hodges-Lehmann	0.985			Difference: Hodges-Lehmann	0.04

## Sheet: wasp egg mimic
10xSTAT-GFP
Mean fuorescence intensity (MFI) fold change		control			wasp egg mimic
control vs wasp egg mimic	Pri.	1	1	1	1.49	1.15	1.21
	Post.	1	1	1	1.38	0.85	0.72
	Discovery	P value	Mean of Control	Mean of wasp egg mimic	Difference	SE of difference	t ratio	df	q value
Pri.	No	0.053859	1	1.283	-0.2833	0.1048	2.704	4	0.108795
Post.	No	0.938161	1	0.9833	0.01667	0.2019	0.08257	4	0.947543
