# Supplementary material for: Differential activation of JAK-STAT signaling reveals functional compartmentalization in Drosophila blood progenitors
Source: eLife. 2021 Feb 17;10:e61409. doi: 10.7554/eLife.61409 (PMC7920551; doi:10.7554/eLife.61409)
Supplement: Figure 5—source data 1. [file elife-61409-fig5-data1.xlsx]

## Sheet: Drs-GFP MFI
Drs-GFP (MFI)	unparasitized	parasitized	unparasitized	parasitized	unparasitized	parasitized		Pri. Lobe unparasitized vs parasitized
4day post-parasitism	Pri.	Pri.	Sec.	Sec.	Tert.	Tert.		Mann Whitney test
	6.25	29.72	6.26	23.59	6.43	25.12		P value	0.0002
	7.41	23.59	6.67	38.05	4.26	40.08		Exact or approximate P value?	Exact
	8.46	21.8	6.47	36.47	6.5	42.01		P value summary	***
	8.72	9.67	7.02	18.04	6.78	17.9		Significantly different (P < 0.05)?	Yes
	6.04	47.18	8.07	67.89	16.04	44.85		One- or two-tailed P value?	Two-tailed
	9.53	36.87	15.31	43.62	20.03	22.56		Sum of ranks in column A,B	67 , 258
	7.7	13	13.72	16.17	14.96	23.64		Mann-Whitney U	12
	13.93	45.91	25.79	78.27	23.52	42.58
	7.47	24.85	14.56	39.74	13.51	76.61		Difference between medians
	19.74	39.66	34.46	36.18	47.79	44.74		Median of column A	8.080, n=10
		10.84		12.2		7.1		Median of column B	21.80, n=15
		12.98		13.37		9.83		Difference: Actual	13.72
		12.3		16.34		12.78		Difference: Hodges-Lehmann	10.8
		16.42		17.46		11.74
		16.94		11.85		10.59
				33.04		29.26		Sec. Lobe unparasitized vs parasitized
								Mann Whitney test
								P value	0.0034
								Exact or approximate P value?	Exact
								P value summary	**
								Significantly different (P < 0.05)?	Yes
								One- or two-tailed P value?	Two-tailed
								Sum of ranks in column C,D	81 , 270
								Mann-Whitney U	26
								Difference between medians
								Median of column C	10.90, n=10
								Median of column D	28.32, n=16
								Difference: Actual	17.42
								Difference: Hodges-Lehmann	11.11
								Tert. Lobe unparasitized vs parasitized
								Mann Whitney test
								P value	0.0532
								Exact or approximate P value?	Exact
								P value summary	ns
								Significantly different (P < 0.05)?	No
								One- or two-tailed P value?	Two-tailed
								Sum of ranks in column E,F	98 , 253
								Mann-Whitney U	43
								Difference between medians
								Median of column E	14.24, n=10
								Median of column F	24.38, n=16
								Difference: Actual	10.15
								Difference: Hodges-Lehmann	10.15

## Sheet: Ratio NRE-GFP 
NRE-GFP/DAPI	unparasitized	parasitized	unparasitized	parasitized	unparasitized	parasitized
4day post-parasitism	Pri.	Pri.	Sec.	Sec.	Tert.	Tert.		Pri. Lobe unparasitized vs parasitized
	0.014	0.003	0	0	0	0		Mann Whitney test
	0.022	0.001	0	0	0	0		P value	0.0062
	0.017	0.032	0	0	0	0		Exact or approximate P value?	Exact
	0.021	0.0008	0	0.005	0	0		P value summary	**
	0.07		0	0	0	0		Significantly different (P < 0.05)?	Yes
	0.008		0		0			One- or two-tailed P value?	Two-tailed
	0.024	0.0008	0	0.002	0	0		Sum of ranks in column A,B	179.5 , 51.50
	0.023		0	0.005	0	0		Mann-Whitney U	15.5
	0.018	0.007	0	0.008	0	0
	0.017	0.017	0	0	0	0		Difference between medians
	0.016	0.002	0	0	0	0		Median of column A	0.02100, n=13
	0.025		0	0	0	0		Median of column B	0.002500, n=8
	0.032		0		0			Difference: Actual	-0.0185
								Difference: Hodges-Lehmann	-0.0156
								Sec. Lobe unparasitized vs parasitized
								Mann Whitney test
								P value	0.0311
								Exact or approximate P value?	Exact
								P value summary	*
								Significantly different (P < 0.05)?	Yes
								One- or two-tailed P value?	Two-tailed
								Sum of ranks in column C,D	136.5 , 163.5
								Mann-Whitney U	45.5
								Difference between medians
								Median of column C	0.000, n=13
								Median of column D	0.000, n=11
								Difference: Actual	0
								Difference: Hodges-Lehmann	0
								Tert. Lobe unparasitized vs parasitized
								Mann Whitney test
								P value	>0.9999
								Exact or approximate P value?	Exact
								P value summary	ns
								Significantly different (P < 0.05)?	No
								One- or two-tailed P value?	Two-tailed
								Sum of ranks in column E,F	162.5 , 137.5
								Mann-Whitney U	71.5
								Difference between medians
								Median of column E	0.000, n=13
								Median of column F	0.000, n=11
								Difference: Actual	0
								Difference: Hodges-Lehmann	0

## Sheet: 10x STAT-GFP MFI 
10xSTAT-GFP MFI	unparasitized	parasitized	unparasitized	parasitized	unparasitized	parasitized
4day post-parasitism	Pri.	Pri.	Sec	Sec.	Tert.	Tert.			Pri. Lobe unparasitized vs parasitized
	6.36	4.85	11.18	15.25	15.5	33.76			Mann Whitney test
	8.72	3.1	7.48	23.6	13.58	38.6			P value	0.0504
	2	2.8	9	15.32	8.75	23.15			Exact or approximate P value?	Exact
	3.9	2.5	10.02	22.01	5.9	22.85			P value summary	ns
	5.03	2.9	7.1	32.6	10.43	51.65			Significantly different (P < 0.05)?	No
	4.1	3.35	5.85	28.7	6.4	43.4			One- or two-tailed P value?	Two-tailed
	3.2	2	5.16	20.43	7.35	37.83			Sum of ranks in column A,B	126.5 , 104.5
	5.43	2.3	4.83	13.82	6.43	31.96			Mann-Whitney U	26.5
	4.67	5.25	8.05	14.5	11.98	33.06
		3.85		32.8		36.86			Difference between medians
		4.9		29.36		54.15			Median of column A	4.670, n=9
		2.65		22.35		29.2			Median of column B	3.000, n=12
									Difference: Actual	-1.67
									Difference: Hodges-Lehmann	-1.36
									Sec. Lobe unparasitized vs parasitized
									Mann Whitney test
									P value	<0.0001
									Exact or approximate P value?	Exact
									P value summary	****
									Significantly different (P < 0.05)?	Yes
									One- or two-tailed P value?	Two-tailed
									Sum of ranks in column C,D	45 , 186
									Mann-Whitney U	0
									Difference between medians
									Median of column C	7.480, n=9
									Median of column D	22.18, n=12
									Difference: Actual	14.7
									Difference: Hodges-Lehmann	14.59
									Tert. Lobe unparasitized vs parasitized
									Mann Whitney test
									P value	<0.0001
									Exact or approximate P value?	Exact
									P value summary	****
									Significantly different (P < 0.05)?	Yes
									One- or two-tailed P value?	Two-tailed
									Sum of ranks in column E,F	45 , 186
									Mann-Whitney U	0
									Difference between medians
									Median of column E	8.750, n=9
									Median of column F	35.31, n=12
									Difference: Actual	26.56
									Difference: Hodges-Lehmann	25.96

## Sheet: domeMESO-GFP
domeMESO-GFP MFI
4day post-parasitism	Unparasitized	Parasitized	Unparasitized	Parasitized	Unparasitized	Parasitized		Comparison pri. Lobes unparasitizd vs parasitized			Comparison tert. Lobes unparasitizd vs parasitized
	pri.	pri.	sec.	sec.	tert.	tert.
	16.19	27.8	4.45	23.08	0	0		Mann Whitney test			Mann Whitney test
	48.09	4.56	8.73	11.09	0	9.41		P value	0.6574		P value	0.0023
	9.45	32.46	1.46	18.92	0	4.4		Exact or approximate P value?	Exact		Exact or approximate P value?	Exact
	8.94	10.97	5.99	22.78	4.09	3.28		P value summary	ns		P value summary	**
	25.06	26.81	3.91	6.98	0	4.88		Significantly different (P < 0.05)?	No		Significantly different (P < 0.05)?	Yes
	10.51	29.57	8.92	6.77	0	0		One- or two-tailed P value?	Two-tailed		One- or two-tailed P value?	Two-tailed
	21.63	13.93	7.52	17.35	0	11.53		Sum of ranks in column A,B	74 , 116		Sum of ranks in column E,F	46 , 144
	41.21	40.3	11.43	22.05	0	4.67		Mann-Whitney U	38		Mann-Whitney U	10
		17.93		24.1		22.81
		31.07		18.8		9.72		Difference between medians			Difference between medians
		18.95		20.53		12.62		Median of column A	18.91, n=8		Median of column E	0.000, n=8
								Median of column B	26.81, n=11		Median of column F	4.880, n=11
								Difference: Actual	7.9		Difference: Actual	4.88
								Difference: Hodges-Lehmann	2.75		Difference: Hodges-Lehmann	4.88
								Comparison sec. Lobes unparasitizd vs parasitized
								Mann Whitney test
								P value	0.0025
								Exact or approximate P value?	Exact
								P value summary	**
								Significantly different (P < 0.05)?	Yes
								One- or two-tailed P value?	Two-tailed
								Sum of ranks in column C,D	45 , 145
								Mann-Whitney U	9
								Difference between medians
								Median of column C	6.755, n=8
								Median of column D	18.92, n=11
								Difference: Actual	12.17
								Difference: Hodges-Lehmann	12.74

## Sheet: CantonS_Tep1 in situ
Tep1 in situ	unparasitized	set1	set2	set3	set4
Fold change	Pri.	1	1	1	1
	Sec.	1	1	1	1
	tert.	1	1	1	1
	Parasitized
	Pri.	1.05	1.43	0.95	1.13
	Sec.	1.12	1.5	1.16	1.7
	tert.	1.06	1.21	0.72	1.54
		p value	Mean of unparasitized	Mean of parasitized	Difference	SE of difference	t ratio	df
	Pri.	0.224681	1	1.14	-0.14	0.1034	1.353	6
	Sec.	0.037588	1	1.37	-0.37	0.1392	2.659	6
	tert.	0.465773	1	1.133	-0.1325	0.1702	0.7787	6

## Sheet: dome>UAS-STAT Tep1 in situ
Relative intensity (AU)
tep1 insitu
dome
Pri.	10.03	3.08	5.024	5.06	10.09	11.78	16.82
Sec.	6.01	11.55	13.96	6.59	13.52	14.73	13.32
Tert.	4.46	7.84	6.52	10.11	11.98	17.23	9.2
dome>UAS-STAT
Pri.	50.51	35.08	41.43	21.31	17.84	19.22	23.5	23.27	45.29	41.79
Sec.	31.63	41.5	42.1	21.3	20.99	39.33	22.67	40.76	20.2	33.65
Tert.	36.39	41.88	37.24	12.17	15.6	25.76	26.78	37.51	31.41	20.12
	P value	Mean of dome	Mean of dome> UAS-Stat92E	Difference	SE of difference	t ratio	df
Pri.	0.000274	8.841	31.92	-23.08	4.891	4.72	15
Sec.	7.9e-05	11.38	31.41	-20.03	3.736	5.361	15
Tert.	0.000325	9.62	28.49	-18.87	4.072	4.633	15
