# Supplementary material for: Differential activation of JAK-STAT signaling reveals functional compartmentalization in Drosophila blood progenitors
Source: eLife. 2021 Feb 17;10:e61409. doi: 10.7554/eLife.61409 (PMC7920551; doi:10.7554/eLife.61409)
Supplement: Figure 6—source data 1. [file elife-61409-fig6-data1.xlsx]

## Sheet: cell Morphology dome>statRNAi
		Lamellocyte range					Lamellocyte range
larvae (%)	domeGal4	0	1 to 25	>25		dome>Stat92ERNAi	0	1 to 25	>25
	Pri.	50	30	20		Pri.	40	20	40
	sec.	90	10	0		sec.	40	30	30
	tert.	100	0	0		tert.	70	0	30
		Cell coalesced range					Cell coalesced range
larvae (%)	domeGal4	0	1 to 25	>25		dome>Stat92ERNAi	0	1 to 25	>25
	Pri.	90	10	0		Pri.	100	0	0
	sec.	40	50	10		sec.	70	20	10
	tert.	20	40	40		tert.	40	10	50

## Sheet: dome positive cells statKD
Ratio (domeGFP/ DAPI)	domeGal4			dome>statRNAi
	pri.	sec.	tert.	pri.	sec.	tert.
	0.66	0.61	0.11	0.47	0.44	0.61
	0.57	0.71	0.43	0.44	0.52	0.3		Pri. Lobe unparasitized vs parasitized	dome>statRNAi pri.
	0.47	0.34	0.4	0.31	0.49	0.35			vs.
	0.61	0.7	0	0.31	0.51	0.43			domeGal4 pri.
	0.55	0.79	0.45	0.52	0.54	0.52
	0.63	0.76	0.09	0.41	0.26	0.2		Mann Whitney test
	0.67	0.65	0	0.48	0.42	0.21		P value	0.0009
	0.42	0.79	0.42	0.4	0.24	0.17		Exact or approximate P value?	Exact
	0.47	0.81	0.36	0	0	0		P value summary	***
	0.55	0.73	0	0	0	0		Significantly different (P < 0.05)?	Yes
								One- or two-tailed P value?	Two-tailed
								Sum of ranks in column A,D	146 , 64
								Mann-Whitney U	9
								Difference between medians
								Median of column A	0.5600, n=10
								Median of column D	0.4050, n=10
								Difference: Actual	-0.155
								Difference: Hodges-Lehmann	-0.17
								Sec. Lobe unparasitized vs parasitized
									dome>statRNAi sec.
									vs.
									domeGal4 sec.
								Mann Whitney test
								P value	0.0003
								Exact or approximate P value?	Exact
								P value summary	***
								Significantly different (P < 0.05)?	Yes
								One- or two-tailed P value?	Two-tailed
								Sum of ranks in column B,E	149 , 61
								Mann-Whitney U	6
								Difference between medians
								Median of column B	0.7200, n=10
								Median of column E	0.4300, n=10
								Difference: Actual	-0.29
								Difference: Hodges-Lehmann	-0.3
								Tert. Lobe unparasitized vs parasitized
									dome>statRNAi tert.
									vs.
									domeGal4 tert.
								Mann Whitney test
								P value	0.6421
								Exact or approximate P value?	Exact
								P value summary	ns
								Significantly different (P < 0.05)?	No
								One- or two-tailed P value?	Two-tailed
								Sum of ranks in column C,F	98.50 , 111.5
								Mann-Whitney U	43.5
								Difference between medians
								Median of column C	0.2350, n=10
								Median of column F	0.2550, n=10
								Difference: Actual	0.02
								Difference: Hodges-Lehmann	0.065

## Sheet: LG histolysis dome stat KD
larvae (%)
		domeGal4					dome>statRNAi
		histolyzed	histolyzing	intact			histolyzed	histolyzing	intact
	Pri.	0	40	60		Pri.	0	90	10
	sec.	0	10	90		sec.	0	0	100
	tert.	0	0	100		tert.	0	0	100

## Sheet: cell morphology ubx statKD
larvae (%)	ubxGal4	Lamellocyte range			ubx>stat92ERNAi	Lamellocyte range
		0	1 to 25	>25		0	1 to 25	>25
	Pri.	30	20	50	Pri.	78.57	7.14	14.28
	sec.	90	10	0	sec.	42.85	42.85	14.28
	tert.	90	10	0	tert.	35.71	14.28	50
larvae (%)	ubxGal4	cell coalesced			ubx>stat92ERNAi	cell coalesced
		0	1 to 25	>25		0	1 to 25	>25
	Pri.	90	0	10	Pri.	100	0	0
	sec.	60	40	0	sec.	100	0	0
	tert.	100	0	0	tert.	85.71	14.28	0

## Sheet: P1 positve cells statKD
Ratio (P1/ DAPI)	ubxGal4			ubx> statRNAi
	Pri.	sec.	tert.	Pri.	sec.	tert.		Pri. Lobe unparasitized vs parasitized	ubx> statRNAi pri.
	0.27	0	0.22	1	0.36	0			vs.
	0.49	0	0	1	0.44	0.1			ubxGal4 pri.
	0.39	0	0	0.43	0.53	0.32
	0.48	0	0	1	0.09	0.08		Mann Whitney test
	0.37	0	0	1	0.42	0.01		P value	0.0179
	0.4	0.28	0	0.48	0.07	0		Exact or approximate P value?	Exact
	0.29	0	0	0.46	0	0		P value summary	*
	0.49	0	0	0.31	0.34	0		Significantly different (P < 0.05)?	Yes
				0.39	0.18	0.23		One- or two-tailed P value?	Two-tailed
				1	0.53	0.37		Sum of ranks in column A,D	58 , 195
				0.45	0	0.09		Mann-Whitney U	22
				0.8	0.26	0.18
				1	0.29	0.24		Difference between medians
				0.99	0.3	0.3		Median of column A	0.3950, n=8
								Median of column D	0.8950, n=14
								Difference: Actual	0.5
								Difference: Hodges-Lehmann	0.505
								Sec. Lobe unparasitized vs parasitized	sec.ubx> statRNAi
									vs.
									sec. ubxGal4
								Mann Whitney test
								P value	0.0015
								Exact or approximate P value?	Exact
								P value summary	**
								Significantly different (P < 0.05)?	Yes
								One- or two-tailed P value?	Two-tailed
								Sum of ranks in column B,E	49 , 204
								Mann-Whitney U	13
								Difference between medians
								Median of column B	0.000, n=8
								Median of column E	0.2950, n=14
								Difference: Actual	0.295
								Difference: Hodges-Lehmann	0.275
								Tert. Lobe unparasitized vs parasitized	tert. ubx> statRNAi
									vs.
									tert. ubxGal4
								Mann Whitney test
								P value	0.0154
								Exact or approximate P value?	Exact
								P value summary	*
								Significantly different (P < 0.05)?	Yes
								One- or two-tailed P value?	Two-tailed
								Sum of ranks in column C,F	59 , 194
								Mann-Whitney U	23
								Difference between medians
								Median of column C	0.000, n=8
								Median of column F	0.09500, n=14
								Difference: Actual	0.095
								Difference: Hodges-Lehmann	0.09

## Sheet: LG histolysis ubx stat KD
larvae (%)
	Ubx-Gal4				Ubx> statRNAi
	histolyzed	histolyzing	intact		histolyzed	histolyzing	intact
	0	100	0		71.42	14.28	14.28
	0	0	100		0	64.28	35.71
	0	0	100		0	14.28	85.71
