# Supplementary material for: Differential activation of JAK-STAT signaling reveals functional compartmentalization in Drosophila blood progenitors
Source: eLife. 2021 Feb 17;10:e61409. doi: 10.7554/eLife.61409 (PMC7920551; doi:10.7554/eLife.61409)
Supplement: Figure 7—figure supplement 1—source data 1. [file elife-61409-fig7-figsupp1-data1.xlsx]

## Sheet: dome upd 3 insitu
								dome
dome				dome				unparasitized vs parasitized
unparasitized	MFI prim	MFI sec	MFI ter	Parasitized	MFI prim	MFI sec	MFI ter	pri. Lobe			sec. Lobe			tert. lobe
	63.5987	78.1947	52.322		histolyzed	33.925	81.702
	100.6599	107.7219	91.103		histolyzed	29.085	17.642	Unpaired t test			Unpaired t test			Unpaired t test
	77.8481	93.3183	61.524		histolyzed	14.58	30.841	P value	0.0849		P value	<0.0001		P value	0.0229
	87.6315	109.0503	104.549		histolyzed	18.093	28.717	P value summary	ns		P value summary	****		P value summary	*
	37.3736	93.9798	71.615		histolyzed	47.794	27.352	Significantly different (P < 0.05)?	No		Significantly different (P < 0.05)?	Yes		Significantly different (P < 0.05)?	Yes
	76.9725	60.732	69.486		histolyzed	76.059	46.877	One- or two-tailed P value?	Two-tailed		One- or two-tailed P value?	Two-tailed		One- or two-tailed P value?	Two-tailed
	71.7497	85.7403	92.173		histolyzed	77.86	66.621	t, df	t=1.878, df=12		t, df	t=4.851, df=20		t, df	t=2.464, df=20
	94.9014	100.9647	89.311		histolyzed	92.49	80.306
	48.3692	96.2064	93.523		45.286	73.572	37.311
	64.1938	121.0581	14.006		34.956	32.717	86.934
	44.2343	105.6015	126.203
	51.4723	95.0841	86.934
Upd 3	MFI prim	MFI sec	MFI ter	Upd 3	MFI prim	MFI sec	MFI ter	upd 3
Unparasitized	63.3358	76.0716	82.759	parasitized	39.509	21.004	57.235	unparasitized vs parasitized
	116.402	94.1652	78.515		13.647	23.9	21.437	pri. Lobe			sec. Lobe			tert. lobe
	120.2223	112.0689	85.507		28.49	25.229	27.521
	119.7845	84.7341	76.14		36.326	30.715	11.715	Unpaired t test			Unpaired t test			Unpaired t test
	42.6217	44.9703	12.42		histol.	27.254	49.4236	P value	0.0312		P value	<0.0001		P value	0.1401
	55.6028	45.1917	14.023		histol.	30.44	31.212	P value summary	*		P value summary	****		P value summary	ns
	41.3864	80.964	44.889		51.708	40.214	49.275	Significantly different (P < 0.05)?	Yes		Significantly different (P < 0.05)?	Yes		Significantly different (P < 0.05)?	No
	49.5836	50.6061	58.686		histolyzed	29.077	43.953	One- or two-tailed P value?	Two-tailed		One- or two-tailed P value?	Two-tailed		One- or two-tailed P value?	Two-tailed
					histolyzed	29.707	21.693	t, df	t=2.468, df=11		t, df	t=6.434, df=19		t, df	t=1.540, df=19
					histolyzed	29.615	21.577
					histolyzed	31.726	36.17
					histolyzed	31.407	74.917
					histolyzed	28.363	72.387
