# Supplementary material for: Differential activation of JAK-STAT signaling reveals functional compartmentalization in Drosophila blood progenitors
Source: eLife. 2021 Feb 17;10:e61409. doi: 10.7554/eLife.61409 (PMC7920551; doi:10.7554/eLife.61409)
Supplement: Figure 7—source data 1. [file elife-61409-fig7-data1.xlsx]

## Sheet: Upd3-GFP positive cells
cell numbers (Upd3>UAS-GFP/ DAPI)
	unparasitized				Parasitized				pri. Unparasitized vs parasitized			sec. Unparasitized vs parasitized
	Pri.	Sec.	Tert.		Pri.	Sec.	Tert.		Mann-whitney			Mann-whitney
	0.19	0.26	0.27		0.07	0.1	0.14		Table Analyzed	statistics upd3Gal4-GFP/DAPI		Table Analyzed	statistics upd3Gal4-GFP/DAPI
	0.06	0.02	0.16		disintegrated	0.1	0.28
	0.3	0.28	0.28		0.33	0.58	0.24			pri. parasitizd			sec para
	0.18	0.35	0.19		0.13	0.09	0.25			vs.			vs.
	0.19	0.31	0.47		0.38	0.34	0.91			Pri.unparasitized			sec unpara
	0.39	0.21	0.32		disintegrated	0.16	0.27
	0.29	0.19	0.49		disintegrated	0.12	0.27		Mann Whitney test			Mann Whitney test
	0.37	0.31	0.24		disintegrated	0.15	0.21		P value	0.8104		P value	0.4071
	0.3	0.13	0.14		0.16	0.1	0.2		Exact or approximate P value?	Exact		Exact or approximate P value?	Exact
	0.17	0.11	0.31		0.23	0.17	0.14		P value summary	ns		P value summary	ns
					0.31	0.36	0.23		Significantly different (P < 0.05)?	No		Significantly different (P < 0.05)?	No
					0.19	0.18	0.37		One- or two-tailed P value?	Two-tailed		One- or two-tailed P value?	Two-tailed
									Sum of ranks in column A,B	98 , 73		Sum of ranks in column C,D	128 , 125
									Mann-Whitney U	37		Mann-Whitney U	47
									Difference between medians			Difference between medians
									Median of column A	0.2400, n=10		Median of column C	0.2350, n=10
									Median of column B	0.2100, n=8		Median of column D	0.1550, n=12
									Difference: Actual	-0.03		Difference: Actual	-0.08
									Difference: Hodges-Lehmann	-0.015		Difference: Hodges-Lehmann	-0.035
									tert. Unparasitized vs parasitized
									Table Analyzed	statistics upd3Gal4-GFP/DAPI
										tert para
										vs.
										tert. unpara
									Mann Whitney test
									P value	0.5269
									Exact or approximate P value?	Exact
									P value summary	ns
									Significantly different (P < 0.05)?	No
									One- or two-tailed P value?	Two-tailed
									Sum of ranks in column E,F	125 , 128
									Mann-Whitney U	50
									Difference between medians
									Median of column E	0.2750, n=10
									Median of column F	0.2450, n=12
									Difference: Actual	-0.03
									Difference: Hodges-Lehmann	-0.03

## Sheet: Upd3-GFP MFI
Mean fluorescence intensity (MFI)
Upd3>UAS-GFP (MFI)	unparasitized				Parasitized				pri. Unparasitized vs parasitized				tert. Unparasitized vs parasitized
	Pri.	Sec.	Tert.		Pri.	Sec.	Tert.			Pri. parasitized				Tert. parasitized
	27.62	21.92	18		8.51	4.22	13.98			vs.				vs.
	20.23	15.02	18.19		10.14	10.39	5.37			Pri. unparasitiszed				Tert. unparasitiszed
	28.86	20.02	21.73		7.85	11	19.61
	14.12	16.28	13.13		10.33	14.72	4.62		Mann Whitney test				Mann Whitney test
	28.52	28.74	30.96		13.59	5.27	3.51		P value	0.0029			P value	0.3712
	14.57	20.21	25.37		2.04	7.12	18.58		Exact or approximate P value?	Exact			Exact or approximate P value?	Exact
	18.64	10.71	14.82		41.14	23.37	28.52		P value summary	**			P value summary	ns
	18.19	14.64	13.38		8.29	28.52	26.79		Significantly different (P < 0.05)?	Yes			Significantly different (P < 0.05)?	No
	11.14	10.37	8.88		4.51	7.58	9.51		One- or two-tailed P value?	Two-tailed			One- or two-tailed P value?	Two-tailed
	10.67	7.96	12.35		9.41	19.74	20.2		Sum of ranks in column A,B	143 , 67			Sum of ranks in column E,F	141 , 159
					disintegrated	12.5	32.33		Mann-Whitney U	12			Mann-Whitney U	54
					disintegrated	11.13	5.03
					disintegrated	9.92	6.18		Difference between medians				Difference between medians
					disintegrated	5.4	2.9		Median of column A	18.42, n=10			Median of column E	16.41, n=10
									Median of column B	8.960, n=10			Median of column F	11.75, n=14
									Difference: Actual	-9.455			Difference: Actual	-4.665
									Difference: Hodges-Lehmann	-9.165			Difference: Hodges-Lehmann	-5.24
									sec. Unparasitized vs parasitized	Sec.parasitized
										vs.
										Sec. unparasitiszed
									Mann Whitney test
									P value	0.0841
									Exact or approximate P value?	Exact
									P value summary	ns
									Significantly different (P < 0.05)?	No
									One- or two-tailed P value?	Two-tailed
									Sum of ranks in column C,D	155 , 145
									Mann-Whitney U	40
									Difference between medians
									Median of column C	15.65, n=10
									Median of column D	10.70, n=14
									Difference: Actual	-4.955
									Difference: Hodges-Lehmann	-5.1

## Sheet: dome-GFP positive cells
cell numbers (dome-Gal4 UAS2xEGFP/ DAPI)
	unparasitized				Parasitized				pri. Unparasitized vs parasitized			tert. Unparasitized vs parasitized
	Pri.	Sec.	Tert.		Pri.	Sec.	Tert.			pri. parasitizd
	0.76	0.76	0.22		0.46	0.64	0.47			vs.			tert parasitized
	0.7	0.48	0		0.39	0.63	0.03			Pri.unparasitized			vs.
	0.67	0.86	0		0.49	0.78	0.03						tert. unparasitized
	0.51	0.75	0.2		0.52	0.76	0.44		Mann Whitney test
	0.57	0.45	0		0.37	0.59	0.44		P value	0.0084		Mann Whitney test
	0.7	0.82	0		0.44	0.78	0		Exact or approximate P value?	Exact		P value	0.2117
	0.73	0.66	0.44		0.59	0.77	0.09		P value summary	**		Exact or approximate P value?	Exact
	0.54	0.4	0		0.46	0.66	0.41		Significantly different (P < 0.05)?	Yes		P value summary	ns
	0.54	0.79	0.13		0.63	0.75	0.22		One- or two-tailed P value?	Two-tailed		Significantly different (P < 0.05)?	No
	0.43	0.75	0.2		0.42	0.27	0		Sum of ranks in column A,B	139 , 71		One- or two-tailed P value?	Two-tailed
									Mann-Whitney U	16		Sum of ranks in column E,F	88.50 , 121.5
												Mann-Whitney U	33.5
									Difference between medians
									Median of column A	0.6200, n=10		Difference between medians
									Median of column B	0.4600, n=10		Median of column E	0.06500, n=10
									Difference: Actual	-0.16		Median of column F	0.1550, n=10
									Difference: Hodges-Lehmann	-0.135		Difference: Actual	0.09
												Difference: Hodges-Lehmann	0.03
									sec. Unparasitized vs parasitized
										sec parasitized
										vs.
										sec unparasitized
									Mann Whitney test
									P value	0.7248
									Exact or approximate P value?	Exact
									P value summary	ns
									Significantly different (P < 0.05)?	No
									One- or two-tailed P value?	Two-tailed
									Sum of ranks in column C,D	110 , 100
									Mann-Whitney U	45
									Difference between medians
									Median of column C	0.7500, n=10
									Median of column D	0.7050, n=10
									Difference: Actual	-0.045
									Difference: Hodges-Lehmann	-0.015

## Sheet: dome-GFP MFI
Mean fluorescence intensity (MFI)									pri. Unparasitized vs parasitized			tert. Unparasitized vs parasitized
dome-Gal4 UAS2xEGFP (MFI)	unparasitized				Parasitized					Pri. parasitized			Tert. parasitized
	Pri.	Sec.	Tert.		Pri.	Sec.	Tert.			vs.			vs.
	47.26	44.26	13.72		34.26	31.57	19.86			pri. unparasitiszed			Tert. unparasitiszed
	63.065	19.67	0		24.18	37	8.34
	51.27	82.32	0		41.06	38.56	4.08		Mann Whitney test			Mann Whitney test
	46.25	63.34	8.73		38.06	59.29	15.12		P value	0.0355		P value	0.2067
	59.85	51.3	0		36.59	48.23	19.2		Exact or approximate P value?	Exact		Exact or approximate P value?	Exact
	75.54	82.2	0		61.49	82.55	0		P value summary	*		P value summary	ns
	92.27	59.43	3.2		59.21	55.26	6.44		Significantly different (P < 0.05)?	Yes		Significantly different (P < 0.05)?	No
	72.23	92.63	29.19		51.24	68.94	33.4		One- or two-tailed P value?	Two-tailed		One- or two-tailed P value?	Two-tailed
	58.62	65.28	16.09		61.64	46.02	15.78		Sum of ranks in column A,B	133 , 77		Sum of ranks in column E,F	88 , 122
	57.64	16.22	0		56.31	19.34	0		Mann-Whitney U	22		Mann-Whitney U	33
									Difference between medians			Difference between medians
									Median of column A	59.24, n=10		Median of column E	1.600, n=10
									Median of column B	46.15, n=10		Median of column F	11.73, n=10
									Difference: Actual	-13.09		Difference: Actual	10.13
									Difference: Hodges-Lehmann	-14.37		Difference: Hodges-Lehmann	4.675
									sec. Unparasitized vs parasitized	Sec. parasitized
										vs.
										Sec. unparasitiszed
									Mann Whitney test
									P value	0.3527
									Exact or approximate P value?	Exact
									P value summary	ns
									Significantly different (P < 0.05)?	No
									One- or two-tailed P value?	Two-tailed
									Sum of ranks in column C,D	118 , 92
									Mann-Whitney U	37
									Difference between medians
									Median of column C	61.39, n=10
									Median of column D	47.13, n=10
									Difference: Actual	-14.26
									Difference: Hodges-Lehmann	-11.95

## Sheet: Asrij MFI fold change
Asrij MFI	unpaarsitized
Fold change	Pri.	1	1	1
	Sec.	1	1	1
	Tert.	1	1	1
	parasitized
	Pri.	0.3	0.24	0.1
	Sec.	0.39	0.2	0.13
	Tert.	0.43	0.2	0.13
	P value	Mean of unparasitized	Mean of parasitized	Difference	SE of difference	t ratio	df
Pri.	0.000186	1	0.2133	0.7867	0.05925	13.28	4
Sec.	0.000611	1	0.24	0.76	0.07767	9.784	4
Tert.	0.001183	1	0.2533	0.7467	0.09062	8.24	4

## Sheet: Dlp positive cells
cell numbers (Dlp/ DAPI)
	unparasitized				Parasitized
	Pri.	Sec.	Tert.		Pri.	Sec.	Tert.
	0.06	0.23	0.75		0	0.43	0.59		pri. Unparasitized vs parasitized	pri. parasitizd		tert. Unparasitized vs parasitized
	0	0.13	0.88		disintegrated	0.22	0.75			vs.			tert parasitized
	0.04	0.29	0.85		0.08	0.4	0.71			Pri.unparasitized			vs.
	0	0.57	0.6		0.18	0.09	0.79						tert. unparasitized
	0	0.68	0.79		disintegrated	0.08	0.81		Mann Whitney test
	0	0.22	0.66		disintegrated	0.1	0.66		P value	0.2705		Mann Whitney test
	0	0.46	0.71		0	0.09	0.55		Exact or approximate P value?	Exact		P value	0.149
	0.03	0.47	0.91		disintegrated	0.06	0.52		P value summary	ns		Exact or approximate P value?	Exact
	0	0.14	0.75		disintegrated	0.25	0.93		Significantly different (P < 0.05)?	No		P value summary	ns
	0	0.1	0.8		0	0.35	0.84		One- or two-tailed P value?	Two-tailed		Significantly different (P < 0.05)?	No
					0	0.47	0.34		Sum of ranks in column A,B	87.50 , 102.5		One- or two-tailed P value?	Two-tailed
					0.13	0.53	0.75		Mann-Whitney U	32.5		Sum of ranks in column E,F	150 , 150
					0.12	0.61	0.66					Mann-Whitney U	45
					0	0.47	0.69		Difference between medians
									Median of column A	0.000, n=10		Difference between medians
									Median of column B	0.000, n=9		Median of column E	0.7700, n=10
									Difference: Actual	0		Median of column F	0.7000, n=14
									Difference: Hodges-Lehmann	0		Difference: Actual	-0.07
												Difference: Hodges-Lehmann	-0.075
									sec. Unparasitized vs parasitized	sec parasitized
										vs.
										sec unparasitized
									Mann Whitney test
									P value	0.5356
									Exact or approximate P value?	Exact
									P value summary	ns
									Significantly different (P < 0.05)?	No
									One- or two-tailed P value?	Two-tailed
									Sum of ranks in column C,D	136 , 164
									Mann-Whitney U	59
									Difference between medians
									Median of column C	0.2600, n=10
									Median of column D	0.3000, n=14
									Difference: Actual	0.04
									Difference: Hodges-Lehmann	-0.04

## Sheet: Dlp MFI fold change
Dlp MFI (Fold change)
	unparasitized			parasitized
Pri.	1	1	1	1.48	1	1.5
Sec.	1	1	1	1.12	0.77	1.25
Tert.	1	1	1	0.97	1.15	0.98
t -test	Discovery	P value	Mean of unparasitized	Mean of parasitized	Difference	SE of difference	t ratio	df	q value
Pri.	No	0.116282	1	1.327	-0.3267	0.1634	1.999	4	0.352335
Sec.	No	0.761061	1	1.047	-0.04667	0.1433	0.3256	4	0.768671
Tert.	No	0.598716	1	1.033	-0.03333	0.0584	0.5707	4	0.768671

## Sheet: cell morphology e33c>DlpRNAi
larvae (%)
lamellocytes range	0	1 -25	>25
e33cGal4
Pri.	33.33	22.22	44.44
Sec.	60	40	0
Tert.	100	0	0
e33c>DlpRNAi
Pri.	40	50	10
Sec.	80	0	20
Tert.	80	10	10
larvae (%)
cell coalesced phenotype	Range
e33cGal4	0	1 -25	>25
Pri.	100	0	0
Sec.	90	10	0
Tert.	40	40	20
e33c>DlpRNAi
Pri.	80	20	0
Sec.	30	60	10
Tert.	10	10	80

## Sheet: CS post parasitism lat in situ 
latran in situ	unpaarsitized	set1	set2	set3	set4
Fold change	Pri.	1	1		1
	Sec.	1	1	1	1
	Tert.	1	1	1	1
	parasitized
	Pri.	1.19	0.76		0.9
	Sec.	0.71	0.71	0.87	0.9
	Tert.	0.66	0.86	0.76	0.86
	P value	Mean of unparasitized	Mean of Parasitized	Difference	SE of difference	t ratio	df
Pri.	0.713087	1	0.95	0.05	0.1266	0.3949	4
Sec.	0.007289	1	0.7975	0.2025	0.05089	3.979	6
Tert.	0.004143	1	0.785	0.215	0.04787	4.491	6
